# Supplementary material for: Clinically Distinct Phenotypes of Canavan Disease Correlate with Residual Aspartoacylase Enzyme Activity
Source: PubMed Central journal article supplement (PMC5412892; doi:10.1002/humu.23181), 2017-02-14
Supplement: HUMU-38-524-s001.pdf [file HUMU-38-524-s001.pdf]

Table S1: Oligonucleotides used for cloning and site directed mutagenesis reactions

| Primer            | Sequence (5' → 3')                                                  |
|-------------------|---------------------------------------------------------------------|
| ASPA_Clon_F       | GAGGCGATCGCCATGACTTCTTGTACATTGCTGA                                  |
| ASPA_Clon_R       | GCGTCGGTCCGCTCTAATGTAAACAGCAGCGAATA                                 |
| ASPA_SDM_70G_A_F  | CTTTGGAGGAACCCATGGGAATA <u>A</u> AGCTAACCGGAG                       |
| ASPA_SDM_70G_A_R  | CTCCGGTTAGCTT <u>A</u> TTCCCATGGGTTCTCCAAAG                         |
| ASPA_SDM_89T_C_F  | GCTAACCGGAGTATTT <u>C</u> GGTTAAGCATTGGCTAG                         |
| ASPA_SDM_89T_C_R  | CTAGCCAATGCTTAACCG <u>G</u> AAATACTCCGGTTAGC                        |
| ASPA_SDM_170C_T_F | CATTTATTACTAACCCCAGAGT <u>A</u> GTGAAGAAGTGTACCAGATA                |
| ASPA_SDM_170C_T_R | TATCTGGTACACTTCTTCACT <u>A</u> CTCTGGGGTTAGTAATAAATG                |
| ASPA_SDM_188G_C_F | GCAGTGAAGAAGTGTACCA <u>C</u> ATATATTGACTGTGACCTG                    |
| ASPA_SDM_188G_C_R | CAGGTCACAGTCAATATAT <u>G</u> TGGTACACTTCTTCACTGC                    |
| ASPA_SDM_206T_G_F | CAGATATATTGACTGTGACC <u>G</u> GAATCGCATTTTTGACCTTG                  |
| ASPA_SDM_206T_G_R | CAAGGTCAAAAATGCGATT <u>C</u> GGTACAGTCAATATATCTG                    |
| ASPA_SDM_302G_T_F | AGGGCTCAAGAAATAAATCATTTATTT <u>G</u> TCCAAAAGACAGTGAAGAT            |
| ASPA_SDM_302G_T_R | ATCTTCACTGTCTTTT <u>G</u> GAA <u>C</u> AAATAAATGATTTATTTCTTGAGCCCT  |
| ASPA_SDM_385G_A_F | CATGGGGTGCACACTCTTATTCTT <u>A</u> AGGATTCCAGGAATA                   |
| ASPA_SDM_385G_A_R | TATTCCTGGAATCCTT <u>A</u> AGAATAAGAGTGCACCCCATG                     |
| ASPA_SDM_509T_C_F | TATGCGACCACTCGTTCC <u>A</u> CAGCCAAGTATCCTG                         |
| ASPA_SDM_509T_C_R | CAGGATACTTGGCT <u>G</u> TGGAACGAGTGGTCGCATA                         |
| ASPA_SDM_539G_T_F | TGTGGGTATAGAAGTT <u>G</u> TCCTCAGCCTCAAGGG                          |
| ASPA_SDM_539G_T_R | CCCTTGAGGCTGAGGA <u>A</u> CAACTTCTATACCCACA                         |
| ASPA_SDM_610G_C_F | AAATGAGAAAAATGATTAACATGCTCTT <u>C</u> ATTTTATACATCATTTCAATGAAGGAAAA |
| ASPA_SDM_610G_C_R | TTTTCTTCATTGAAATGATGTATAAAAT <u>G</u> AAGAGCATGTTTAATCATTTTTCTCATT  |
| ASPA_SDM_743A_G_F | CATCCATCCTAATCTGC <u>G</u> GGATCAAGACTGGAAAC                        |
| ASPA_SDM_743A_G_R | GTTTCCAGTCTTGATCC <u>C</u> GCAGATTAGGATGGATG                        |
| ASPA_SDM_854A_C_F | GTACCCCGTGTGTTGTGAATG <u>C</u> GGACGCATATTACGAAAAG                  |
| ASPA_SDM_854A_C_R | CTTTTCGTAATATGCGTCC <u>C</u> CATTACAAACACGGGGTAC                    |
| ASPA_SDM_857C_A_F | CCCGTGTGTTGTGAATGAGG <u>A</u> CGCATATTACGAAAAGAAA                   |
| ASPA_SDM_857C_A_R | TTTTTTTTCGTAATATGCGT <u>C</u> CCTCATTACAAACACGGG                    |
| ASPA_SDM_914C_A_F | GACAACATAACTAACGCTCAATG <u>A</u> AAAAAGTATTCGCTGCTGTTTAC            |
| ASPA_SDM_914C_A_R | GTAAACAGCAGCGAATACTTTTT <u>I</u> CATTGAGCGTTAGTTTGTGTC              |

Note: F – Forward, R – Reverse. Mismatch nucleotides are underlined.
